# Supplementary material
Source: MDPI journal article supplement (https://www.mdpi.com/2079-8954/4/2/18)
Supplement: s1 [file s1]

Supplementary Materials: Systems of Interaction between the First Sedentary Villages in the Near East Exposed Using Agent Based Modelling of Obsidian Exchange

David Ortega Juan José Ibáñez, Daniel Campos, Lamya Khalidi, Vicenç Méndez and Luís Teira

**Table S1.** Count and ratio for obsidian and flint artifacts in the Pre-Pottery Neolithic A (left) and Pre-Pottery Neolithic B (right) sites.

| **Id** | **Period** | **Site** | **Km** | **Ratio** | **Flint** | **Obs** | **Reference** |
| --- | --- | --- | --- | --- | --- | --- | --- |
| 1 | PPNB | Kayırlı-Bitlikeler | 0 | 100 | - | - | [[1](#_ENREF_1)]: 38 |
| 2 | PPNB | Kömürcü-Kaletepe | 0 | 100 | 0 | 828 | [[2](#_ENREF_2)]: tab. 1 |
| 3 | PPNB | Aşıklı Höyük | 41 | 99.98 | 5 | 22,000 | [[3](#_ENREF_3)]: 145 |
| 4 | PPNB | Musular | 41 | 99.6 | 20 | 5000 | [[4](#_ENREF_4)]: 152 |
| 5 | PPNB | Hacıbeyli Höyük | 75 | 99.18 | 1 | 121 | [[5](#_ENREF_5)]: tab. 1 |
| 6 | PPNA | Hallan Çemi | 119 | 56 | 2945 | 3748 | [[6](#_ENREF_6)]: tab. 4 |
| 7 | PPNA | Çayönü | 123 | 5.65 | 6899 | 413 | [[7](#_ENREF_7)]: tabs. 1–2 |
| 8 | PPNB | Çayönü | 123 | 62 | 4541 | 4508 | [[7](#_ENREF_7)]: tabs 1–2 |
| 9 | PPNA | Gusir Höyük | 128 | 9.02 | 716 | 71 | [[8](#_ENREF_8)]: 290 |
| 10 | PPNA | Demirköy Höyük | 143 | 9.1 | 7216 | 722 | [[6](#_ENREF_6)]: tab. 4 |
| 11 | PPNB | Boytepe | 144 | 94.33 | 51 | 848 | [[9](#_ENREF_9)]: tab. 1 |
| 12 | PPNB | Can Hasan III | 147 | 97.44 | 1823 | 69,497 | [[10](#_ENREF_10)]: fig. 15 |
| 13 | PPNB | Çatal Höyük | 219 | 94.73 | 676 | 12,161 | [[11](#_ENREF_11)]: tab. 11.1 |
| 14 | PPNB | Cafer Höyük | 223 | 90.1 | - | - | [[12](#_ENREF_12)]: 80 |
| 15 | PPNA | Göbekli Tepe | 262 | 1 | - | - | [[13](#_ENREF_13)]: 51 |
| 16 | PPNB | Tell Seker al-Aheimar | 266 | 38.6 | 516 | 324 | [[14](#_ENREF_14)]: tab. 1 |
| 17 | PPNB | Gürcütepe II | 282 | 6.9 | - | - | [[15](#_ENREF_15)] 39 |
| 18 | PPNB | Hayaz Höyük | 308 | 2.5 | 4251 | 115 | [[16](#_ENREF_16)]: tab. 1, 92 |
| 19 | PPNB | Süberde | 321 | 90 | 2993 | 26,937 | [[17](#_ENREF_17)]: 32 |
| 20 | PPNB | Tell Sabi Abyad II | 357 | 57.78 | 480 | 657 | [[18](#_ENREF_18)]: tab. 3.3 |
| 21 | PPNB | Tell Damishiliyya I | 359 | 7.46 | 248 | 20 | [[19](#_ENREF_19)]: tab. 5.1 |
| 22 | PPNB | Mezraa Teleilat | 373 | 8.87 | 1551 | 151 | [[20](#_ENREF_20)]: tabs. V.1 and VII-3 |
| 23 | PPNB | Tell Ain el-Kerkh | 376 | 14.55 | 9710 | 1654 | [[21](#_ENREF_21)]: tab. 3.147 |
| 24 | PPNA | Tell Qaramel | 390 | 0.5 | - | - | [[22](#_ENREF_22)]: 580 |
| 25 | PPNB | Tell Halula | 392 | 14.53 | 2754 | 468 | [[23](#_ENREF_23)]: tab. 1 |
| 26 | PPNA | Jerf el-Ahmar | 394 | 0.9 | - | - | [[24](#_ENREF_24)]: 14 |
| 27 | PPNB | Ras Shamra | 408 | 2.94 | 19,579 | 593 | [[25](#_ENREF_25)] |
| 28 | PPNB | Tell es-Sin | 417 | 10.37 | 527 | 61 | [[26](#_ENREF_26)]: 24 |
| 29 | PPNA | Cheik Hassan | 421 | 0.9 | - | 65 | [[27](#_ENREF_27)] |
| 30 | PPNB | Cheik Hassan | 421 | 0.7 | 5000 | 35 | [[27](#_ENREF_27)]: 13 |
| 31 | PPNB | Bouqras | 426 | 18 | 11,316 | 2484 | [[28](#_ENREF_28)]: 7 |
| 32 | PPNA | Tell Mureybet | 435 | 0.11 | 3679 | 4 | [[29](#_ENREF_29)]: tab. 3 |
| 33 | PPNB | Tell Mureybet | 435 | 3.99 | 2165 | 90 | [[30](#_ENREF_30)]: 325 |
| 34 | PPNB | Abu Hureyra | 440 | 4.88 | - | - | [[31](#_ENREF_31)] |
| 35 | PPNB | Tell Qdeir 1 | 488 | 0.28 | 28,805 | 80 | [[32](#_ENREF_32)]: 53 and 55 |
| 36 | PPNB | El Kowm | 496 | 2.4 | 9668 | 244 | [[33](#_ENREF_33)]: tabs. 6 and 8 |
| 37 | PPNB | Labweh | 549 | 2.08 | 1035 | 22 | [[34](#_ENREF_34)]: tab. 1 |
| 38 | PPNA | Nachcharini | 564 | 0.08 | 1196 | 1 | [[35](#_ENREF_35)] |
| 39 | PPNB | Ghoraife | 634 | 0.56 | 24,322 | 136 | [[36](#_ENREF_36)] |
| 40 | PPNB | Ramad | 637 | 0.9 | 16,422 | 149 | [[37](#_ENREF_37)]: tabs. 5 and 8 |
| 41 | PPNB | Tell Aswad | 647 | 0.67 | 37,751 | 254 | [[38](#_ENREF_38)] |
| 42 | PPNB | Beisamoun | 694 | 0.31 | 4793 | 15 | [[39](#_ENREF_39)]: 153 |
| 43 | PPNB | Horvat Galil | 715 | 0.37 | 8836 | 33 | [[40](#_ENREF_40)]: 195, 207 |
| 44 | PPNB | Mujahiya | 721 | 0.2 | 8311 | 17 | [[41](#_ENREF_41)]: 120, 132 |
| 45 | PPNB | Yiftahel | 750 | 0.01 | 126,925 | 8 | [[42](#_ENREF_42)]: 243 |
| 46 | PPNA | Gesher | 751 | 0 | 7293 | 0 | [[43](#_ENREF_43)]: tab. 4.1 and 198 |
| 47 | PPNB | Munhata | 751 | 0.03 | 14,076 | 4 | [[44](#_ENREF_44)] |
| 48 | PPNB | Kfar HaHoresh | 753 | 0.01 | 120,170 | 7 | [[45](#_ENREF_45)]: tab. 1 and 114 |
| 49 | PPNA | Iraq ed-Dubb | 767 | 0 | 49,000 | 0 | [[46](#_ENREF_46)]: 56 |
| 50 | PPNA | Huzuq Musa | 799 | 0 | 2451 | 0 | [[47](#_ENREF_47)]: tab. 1 |
| 51 | PPNA | Gilgal I | 824 | 0 | 15,000 | 0 | [[48](#_ENREF_48)]: tab. 1 |
| 52 | PPNA | Netiv Hagdud | 824 | 0.02 | 158,568 | 30 | [[49](#_ENREF_49)]: tab. 1 and 417 |
| 53 | PPNA | Salibiya IX | 824 | 0 | 69,583 | 0 | [[50](#_ENREF_50)] |
| 54 | PPNA | Jericho | 836 | 2.91 | 17,974 | 539 | [[51](#_ENREF_51)]: tabs. 2–8 |
| 55 | PPNB | Jericho | 836 | 0.52 | 17,467 | 91 | [[51](#_ENREF_51)]: tabs. 9–16 |
| 56 | PPNB | Abu Gosh | 859 | 0.04 | 18,422 | 8 | [[52](#_ENREF_52)]: 41 |
| 57 | PPNB | Motza | 861 | 4.51 | 9152 | 432 | [[53](#_ENREF_53)]: tab. 2 |
| 58 | PPNA | Hatoula | 864 | 0 | 85,993 | 0 | [[54](#_ENREF_54)] |
| 59 | PPNA | Ain Darat | 886 | 0 | 19,711 | 0 | [[55](#_ENREF_55)]: tab. 1 |
| 60 | PPNA | Dhra’ | 899 | 0 | 64,448 | 0 | [[56](#_ENREF_56)]: tab. 4 |
| 61 | PPNA | Zahrat adh-Dhra’2 | 902 | 0.01 | 52,895 | 4 | [[57](#_ENREF_57)]: 6–7 |
| 62 | PPNA | El-Hemmeh | 925 | 0.02 | 5629 | 1 | [[58](#_ENREF_58)]: tabs. 1–2 |
| 63 | PPNA | Wadi Faynan 16 | 973 | 0.01 | 10,865 | 1 | [[59](#_ENREF_59)]: tab. 1 |
| 64 | PPNB | Nahal Lavan 109 | 983 | 1.3 | 10,944 | 144 | [[60](#_ENREF_60)]: tab. 1 |
| 65 | PPNB | Beidha | 1004 | 0.01 | 44,248 | 3 | [[61](#_ENREF_61)]: 12–15 |

References

1. Balkan-Atlı, N.; Kayacan, N.; Özbasaran, M.; Yildirim, S. Variabilty in the Neolithic arrowheads of Central Anatolia (typological, technological and chronological aspects). In *Beyond Tools. Redefining the PPN Lithic Assemblages of the Levant*,Proceedings of the 3rd Workshop on PPN Chipped Lithic Industries, Venice, Italy, 1–4 November 1998; Caneva, I., Lemorini, C., Zampetti, D., Biagi, P., Eds.; Ex oriente: Berlin, Germany, 2001; pp. 27–43.
2. Balkan-Atlı, N.; Binder, D.; Kuzucuoglu, C. L’atelier neolithique de Kömürcü—Kaletepe: Fouilles de 1998. *Anatol. Antiqu.* **1999**, *7*, 231–243.
3. Esin, U.; Biçakçi, E.; Özbasaran, M.; Balkan Atli, N.; Berker, D.; Yamur, I.; Korkurt Atli, A. Salvage excavations at the pre-pottery site of Asikli Höyük in Central Anatolia. *Anatolica* **1991**, *17*, 123–174.
4. Özbasaran, M. Musular: A general assessment on a new Neolithic site in Central Anatolia. In *Neolithic in Turkey. The Cradle of Civilization*; Özdogan, M., Basgelen, N., Eds.; Arkeoloji ve Sanat Yayinlari: Istanbul, Turkey, 1999; Volume 1, pp. 147–155.
5. Fujii, S. Hacibeyli Höyük: A Pre-Pottery Neolithic site in the Yay-Gölü lake basin, Central Anatolia. In *Essays on Ancient Anatolia and Its Surrounding Civilizations*; Mori, M., Ohmo, M., Eds.; Harrassowitz Verlag: Weisbaden, German, 1995; pp. 131–152.
6. Peasnall, B.L.; Rosenberg, M. A preliminary description of the lithic industry from Demirköy Höyük. In *Beyong Tools*; Caneva, I., Lemorini, C., Zampetti, D., Biagi, P., Eds.; Ex oriente: Berlin, Germany, 2001.
7. Redman, C.L. The Çayönü chipped stone industry: The 1968 and 1970 excavation seasons. In *Prehistoric Village Archaeology in South-Eastern Turkey: The Eighth Millennium BC Site at Çayönü: Its Chipped and Ground Stone Industries and Faunal Remains*; Braidwood, L.S., Braidwood, R.J., Eds.; Archeopress: Oxford, UK, 1982; pp. 17–71.
8. Altinbilek-Algül, Ç. The lithic assemblages of Gusir Höyük (Turkey): The preliminary results. In *Stone Tools in Transition: From Hunter-Gatherers to Farming Societies in the Near East. 7th Conference on PPN Chipped and Ground Stone Industries of the Fertile Crescent*; Borrell, F., Ibáñez, J.J., Molist, M., Eds.; Universitat Autònoma de Barcelona: Bellaterra, Spain, 2013; pp. 289–297.
9. Balkan, N. L’industrie lithique de Boytepe (Turquie). *Paléorient* **1989**, *15*, 87–90.
10. Ataman, K. The Chipped Stone Assemblage from Can Hasan III: A Study in Typology, Technology and Function. Ph.D. Thesis, Univesity Colllege, London, UK, 1988.
11. Carter, T.; Conolly, J.; Spasojevic, A. The chipped stone. In *Changing Materialities at Çatalhöyük: Reports from the 1995–1999 Seasons*; Hodder, I., Ed.; British Institute at Ankara, McDonald Institute Monographs: Ankara, Turkey, 2005; pp. 221–283.
12. Cauvin, J. La stratigraphie de Cafer Höyük-Est (Turquie) et les origines du PPNB du Taurus. *Paléorient* **1989**, *15*, 75–86.
13. Schmidt, K. Göbekli Tepe, southeastern Turkey. A preliminary report on the 1995–1999 excavations. *Paléorient* **2000**, *26*, 45–54.
14. Nishiaki, Y. Preliminary notes on the Pre-Pottery and Pottery Neolithic lithics from Tell Seker al-Aheimar, the Upper Khabur: The 2000–2001 seasons. In *The State of the Stones Terminologies, Continuities and Contexts in Near Eastern Lithics*; Healey, E., Campbell, S., Maeda, O., Eds.; Ex Oriente: Berlin, Germany, 2011; pp. 457–464.
15. Beile-Bohn, M.; Gerber, C.; Morsch, M.; Schmidt, K. Neolithische forschungen in oberMesopotamien Gürcütepe und Göbekli tepe. *Istanb. Mitt.* **1998**, *48*, 5–38.
16. Roodenberg, J. Hayaz Höyük and the final PPNB in the Taurus foothills. *Paléorient* **1989**, *15*, 91–101.
17. Bordaz, J. Suberde, 1965. *Anatol. Stud.* **1966**, *16*, 32–33.
18. Copeland, L. The flint and obsidian artifacts of Tell Sabi Abyad. In *Excavations at Tell Sabi Abyad*; Akkermans, P.M.M.G., Ed.; Brithish Archaeological Reports, International Series: London, UK, 1989; pp. 237–284.
19. Nishiaki, Y. *Lithic Technology of Neolithic Syria*; British Archaeological Reports: Oxford, UK, 2000.
20. Coskunsu, G. *The End of the Pre-Pottery Neolithic in the Middle Euphrates Valley. The Lithic Assemblages of Mezraa Teleilat, Southeastern Turkey*; Harvard University: Cambridge, UK, 2007.
21. Arimura, M. *Néolithisation de la Syrie du nord-ouest. L'évolution des Industrie Lithiques a Tell Ain el-Kerkh (Bassin du Rouj, 8500–6000 cal. Bc*); Université Lumière Lyon 2: Lyon, France, 2007.
22. Mazurowski, R.F. Tell Qaramel. Excavations 2007. *Pol. Archaeol. Mediterr.* **2007**, *19*, 565–585.
23. Molist, M.; Ferrer, A.; González, J.E.; Ibáñez, J.J.; Palomo, T. Élaboration et usage de l’industrie lithique taillée de Tell Halula (Syrie du nord) depuis le 8700 jusqu’à 7500 BP.: État de la recherche. In *Beyond Tools*; Caneva, I., Lermorini, C., Zampetti, D., Biagi, P., Eds.; Ex Oriente: Berlin, Germany, 2001; pp. 243–256.
24. Mottram, M. Jerf el-Ahmar: The chipped stone industry of a PPNA site on the Middle Euphrates. *Neo-Lithics* **1997**, *1*, 14–16.
25. Contenson, H.d. *Préhistoire de Ras Shamra-Ougarit VIIIi*; Éditions Recherche sur les Civilisations: Paris, France, 1992.
26. Roodenberg, J.J. Sondage des niveaux néolithiques de Tell es-Sin, Syrie. *Anatolica* **1979**, *7*, 1979–1980.
27. Abbès, F.; Bellot-Gurlet, L.; Bressy, C.; Cauvin, M.C.; Gratuze, B.; Poupeau, G. Nouvelles recherches sur l’obsidienne de Cheikh Hassan (vallée de l'Euphrate, Syrie) au Néolithique PPNA et PPNA Ancien. *Syria* **2001**, *78*, 5–17.
28. Roodenberg, J.J. *Le Mobilier en Pierre de Bouqras. Utilisation de la Pierre Dans un Site Néolithique sur le Moyen Euphrate (Syrie)*； Nederlands Historisch-Archeologisch Instituut in het Nabije Oosten Istanbul: Uitgaven van het Nederlands Historisch-Archaeologisch Instituut te Istanbul: Istanbul, Turkey, 1986.
29. Skinner, J.H. The Oriental Institute excavations at Mureybet, Syria: Preliminary report on the 1965 campaign, Part II: Chipped stone finds. *J. Near East. Stud.* **1968**, *27*, 282–290.
30. Cauvin, M.C. Mureybet IV. In *From the River to the Sea. The Palaeolithic and the Neolithic on the Euphrates and in the Northern Levant. Studies in Honour of Lorraine Copeland*; British Archaeological Reports; Aurenche, O., Le Mière, M., Sanlaville, P., Eds.; Archeeopress: Oxford, UK, 2004; pp. 323–334.
31. Moore, A.M.T. *The Neolithic of the Levant*.; University of Oxford: Oxford, UK, 1978.
32. Aurenche, O.; Cauvin, M.-C.; Stordeur, D. Qdeir 1, campagne 1980. Une installation néolithique du VII millénaire. *Cah.l'Euphrate St-André-de-Cruzières* **1982**, *31*, 51–77.
33. Dornemann, R.H. *A Neolithic Village at Tell el Kowm in the Syrian Desert*; Oriental Institute of the University of chicago: Chicago, IL, USA, 1986.
34. Khalidi, L.; Gratuze, B.; Haidar-Boustani, M.; Ibáñez, J.J.; Teira, L. Results of geochemical analyses of obsidian artefacts from the neolithic site of Tell Labwe, Lebanon. In *Stone Tools in Transition: From Hunter-Gatherers to Farming Societies in the Near East. 7th Conference on PPN Chipped and Ground Stone Industries of the Fertile Crescent*; Borrell, F., Ibáñez, J.J., Molist, M., Eds.; Universitat Autònoma de Barcelona: Bellaterra, Spain, 2013; pp. 475–494.
35. Garrard, A.; Pirie, A.; Shroeder, B.; Wasse, A. Survey of Nachcharini cave and prehistoric settlement in the northern Anti-Lebanon highlands. *Baal* **2003**, *7*, 15–48.
36. Contenson, H.d. *Aswad et Ghoraifé. Sites Néolithiques en Damascène (syrie) aux IXème et VIIIème Millénaires Avant l'Ère Chrétienne*; Institut Français d'Archéologie du Proche-Orient: Beyrouth, Lebanon, 1995.
37. Contenson, H.d. *Ramad: Site Néolithique en Damascène (syrie) aux VIIIie et VIIe Millénaires avant l'Ère Chrétienne*; Institut Français d’Archéologie du Proche-Orient: Beyrouth, Lebanon, 2000; Volume 157.
38. Cauvin, M.C. L’industrie lithique de Tell Aswad. In *Aswad et Ghoraifé. Sites Néolithiques en Damascène (Syrie) aux IXxème et VIIIième Millénaires Avant l'Ère Chrétienne*; Contenson, H.d., Ed.; Institut Français d’Archéologie du Proche-Orient: Beyrouth, Lebanon, 1995; pp. 83–98.
39. Lechevallier, M. L’industrie lithique (Beisamoun). In *Abou Gosh et Beisamoun. Deux Gisements du VIIie Millénaire Avant l'Ère Chrétienne en Israel*; Lechevallier, M., Ed.; Association Paléorient: Paris, Farnce, 1978; pp. 153–172.
40. Gopher, A. Horvat Galil—An Early PPN site in the Upper Galilee, Israel. *Tel Aviv* **1997**, *24*, 183–222.
41. Gopher, A. Mujahiya, an Early Pre-Pottery Neolithic B Site in the Golan Heights. *Tel Aviv* **1990**, *17*, 115–143.
42. Yellin, J. The source of obsidian artifacts. In *The Pre-Pottery Neolithic B village of Yiftahel. The 1980s and 1990 Excavations*; Garfinkel, Y., Dag, D., Khalaily, H., Marder, O., Milevski, I., Ronen, A., Eds.; ex oriente: Berlin, Germany, 2012; pp. 243–245.
43. Garfinkel, Y.; Dag, D. *Gesher. A Pre-Pottery Neolithic A Site in the Central Jordan Valley, Israel. A Final Report*; Ex oriente: Berlin, Germany, 2006.
44. Gopher, A. *The Flint Assemblages of Munhata (Israel). Final Report*; Association Paléorient: Paris, France, 1989.
45. Goring-Morris, A.N.; Goren, Y.; Horwitz, L.K.; Hershkovitz, I.; Lieberman, R.; Sarel, J.; Bar-Yosef, D. The 1992 season of excavations at the Pre-Pottery Neolithic B settlement of Kfar Hahoresh. *J. Isr. Prehist. Soc.* **1995**, *26*, 74–121.
46. Kuijt, I.; Goodale, N.B. Lithic Technology of the Pre-Pottery Neolithic a and Late Natufian Occupations of 'Iraq ed-Dubb, Jordan. In Proceedings of the 5th Neolithics Workshop, Fréjus, France, 2004.
47. Rosenberg, D.; Yeshurun, R.; Groman-Yaroslavski, I.; Winter, H.; Zertal, A.; Brown-Goodman, R.; Nadel, D. Huzuq Musa—A preliminary report on the test excavation at a Final Epipalaeolithic/PPNA site in the Jordan valley. *Paléorient* **2010**, *36*, 189–204.
48. Garfinkel, Y. Obsidian distribution and cultural contacts in the Southern Levant during the 7th millennium cal. BC. In *The State of the Stones Terminologies, Continuities and Contexts in Near Eastern Lithics*; Healey, E., Campbell, S., Maeda, O., Eds.; Ex Oriente: Berlin, Germany, 2011; pp. 403–409.
49. Bar-Yosef, O.; Gopher, A.; Tchernow, E.; Kislev, M.E. Netiv Hagdud: An Early Neolithic village site in the Jordan valley. *J. Field Archaeol.* **1991**, *18*, 405–424.
50. Enoch-Shiloh, D.; Bar-Yosef, O. Salibiya IX: An Early Neolithic village in the Jordan valley part I: The archaeology of Netiv Hagdud. *Am. Sch. Prehist. Res. Bull.* **1997**, *43*, 13–40.
51. Crowfoot-Payne, J. Appendix C—The flint industries of Jericho. In *Excavation at Jericho*; Kenyon, K.M., Ed.; British School of Archaeology in Jerusalem: London, UK, 1983; Volume 5, pp. 622–758.
52. Lechevallier, M. L’industrie lithique (Abu Gosh). In *Abu Gosh et Beisamoun. Deux Gisements du VIIie Millénaire Avant l'Ère Chrétienne en Israel*; Lechevallier, M., Ed.; Association Paléorient: Paris, France, 1978; pp. 41–74.
53. Khalaily, H.; Bar-Yosef, O.; Barzilai, O.; Boaretto, E.; Bocquentin, F.; Eirikh-Rose, A.; Greenhut, Z.; Goring-Morris, A.N.; Dosseur, G.L.; Marder, O*.* Excavations at Motza in the Judean Hills and the Early Pre-Pottery Neolithic B in the Southern Levant. *Paléorient* **2007**, *33*, 5–37.
54. Lechevallier, M.; Ronen, A. The lithics of the Early Neolithic at Hatoula. *Neolit. Chipp. Stone Ind. Fertile Crescent Stud. Early Near East. Prod. Subsist. Environ.* **1994**, *1*, 395–406.
55. Gopher, A. A preliminary report on the flints from 'Ain Darat: A PPNA site in the Judean desert. In *Neolithic chipped Stone Industries of the Fertile Crescent and Their Contemporaries in Adjacent Regions*; Kozlowski, S.K., Gebel, H.G.K., Eds.; Ex oriente: Berlin, Germany, 1996; pp. 443–452.
56. Goodale, B.; Kuijt, I.; Finlayson, B. The chipped stone assemblage of Dhra’, Jordan: Preliminary resultats on technology, typology, and intra-assemblage variability. *Paléorient* **2002**, *28*, 125–140.
57. Edwards, P.C.; Sayej, G.; Meadows, J.; Metzger, M.C. Zahrat adh-Dhara'2: A new Pre-Pottery Neolithic A site on the Dead Sea plain in Jordan. *Basor* **2002**, *327*, 1–15.
58. Makarewicz, C.; Austin, A.E. Late PPNB occupation at el-Hemmeh: Results from the third excavation season 2006. *Neo-Lithics* **2006**, *2/06*, 19–23.
59. Pirie, A. Wadi Faynan 16 chipped stone: PPNA variability at one site. *Neo-Lithics* **2001**, *2/2001*, 5–8.
60. Burian, F.; Friedman, E.; Mintz, E. Nahal Lavan 109—A Pre-Pottery Neolithic site in the western Negev, Israel. *Festchrift Gunter Samulla Mater. Frühgeschichte Hess.* **1999**, *8*, 95–120.
61. Mortensen, P. A preliminary study of the chipped stone industry from Beidha, an Early Neolithic village in southern Jordan. *Acta Archaeol.* **1970**, *41*, 1–55.
